# Supplementary material
Source: Royal Society of Chemistry journal article supplement (https://www.rsc.org/suppdata/dt/1999/3809/906670e.doc)
Supplement: Supplementary file 1 [file 906670e.doc]

**Supplementary Tables**

**Table S1**. Atomic coordinates ( x 104) and equivalent isotropic displacement parameters (Å2 x 103) for *t*-[Co(tren)(NH3)OP(H)(O)2]ClO4.2H2O. U(eq) is defined as one third of the trace of the orthogonalized Uij tensor.

________________________________________________________________________

x y z U(eq)

________________________________________________________________________

Co(1) 5792(1) 8664(1) 8056(1) 8(1)

P(1) 7377(1) 7131(1) 10173(1) 11(1)

Cl(1) 8783(1) 12839(1) 5242(1) 17(1)

0(1) 7116(2) 8601(2) 9202(1) 15(1)

N(21) 4353(2) 8776(2) 6931(1) 11(1)

N(31) 3633(2) 8609(2) 8912(1) 12(1)

N(11) 5288(2) 11277(2) 7715(1) 13(1)

N(51) 8077(2) 8762(2) 7252(1) 13(1)

O(3) 8278(2) 7745(2) 10936(1) 18(1)

O(2) 5680(2) 6535(2) 10580(1) 21(1)

O(61) 9804(2) 4903(2) 12406(1) 24(1)

N(41) 6284(2) 6060(2) 8176(1) 12(1)

O(6) 8152(2) 11283(2) 5153(1) 27(1)

C(5) 5259(2) 7258(2) 6444(1) 13(1)

O(71) 8581(3) 11515(3) 8605(2) 44(1)

O(7) 10319(2) 12981(3) 4582(1) 39(1)

C(3) 2479(2) 8617(2) 7315(1) 15(1)

C(6) 5632(2) 5611(2) 7276(1) 14(1)

O(8) 9218(3) 12645(2) 6278(1) 36(1)

0(9) 7394(2) 14380(2) 4981(2) 41(1)

C(4) 2420(2) 7831(2) 8448(1) 15(1)

C(2) 4303(2) 10538(2) 6229(1) 13(1)

C(1) 4043(3) 11930(2) 6873(1) 17(1)

**Table S2**. Bond lengths [Å] and angles [°] for *t*-[Co(tren)(NH3)OP(H)(O)2]ClO4.2H2O.

Co(1)-O(1) 1.9243(13)

Co(1)-N(31) 1.9383(15)

Co(1)-N(21) 1.9461(15)

Co(1)-N(11) 1.9697(15)

Co(1)-N(41) 1.9794(15)

Co(1)-N(51) 1.9888(15)

P(1)-O(2) 1.5056(14)

P(1)-O(3) 1.5156(14)

P(1)-O(1) 1.5460(13)

Cl(1)-O(7) 1.4237(16)

Cl(1)-O(9) 1.4338(17)

Cl(1)-O(8) 1.4401(16)

Cl(1)-O(6) 1.4524(15)

N(21)-C(5) 1.498(2)

N(21)-C(2) 1.498(2)

N(21)-C(3) 1.512(2)

N(31)-C(4) 1.481(2)

N(11)-C(1) 1.490(2)

N(41)-C(6) 1.501(2)

C(5)-C(6) 1.514(2)

C(3)-C(4) 1.522(2)

C(2)-C(1) 1.516(2)

O(1)-Co(1)-N(31) 91.01(6)

O(1)-Co(1)-N(21) 177.34(6)

N(31)-Co(1)-N(21) 86.57(6)

O(1)-Co(1)-N(11) 92.04(6)

N(31)-Co(1)-N(11) 92.78(6)

N(21)-Co(1)-N(11) 86.98(6)

O(1)-Co(1)-N(41) 95.51(6)

N(31)-Co(1)-N(41) 91.48(6)

N(21)-Co(1)-N(41) 85.66(6)

N(11)-Co(1)-N(41) 171.27(6)

O(1)-Co(1)-N(51) 85.34(6)

N(31)-Co(1)-N(51) 176.22(6)

N(21)-Co(1)-N(51) 97.06(6)

N(11)-Co(1)-N(51) 86.38(6)

N(41)-Co(1)-N(51) 89.86(6)

O(2)-P(1)-O(3) 114.09(8)

O(2)-P(1)-O(1) 112.55(8)

O(3)-P(1)-O(1) 108.90(8)

O(7)-Cl(1)-O(9) 110.61(12)

O(7)-Cl(1)-O(8) 110.11(12)

O(9)-Cl(1)-O(8) 109.29(11)

O(7)-Cl(1)-O(6) 109.29(10)

O(9)-Cl(1)-O(6) 108.94(10)

O(8)-Cl(1)-O(6) 108.56(10)

P(1)-0(1)-Co(1) 126.80(8)

C(5)-N(21)-C(2) 112.38(13)

C(5)-N(21)-C(3) 111.38(14)

C(2)-N(21)-C(3) 109.24(13)

C(5)-N(21)-Co(1) 105.73(10)

C(2)-N(21)-Co(1) 107.70(11)

C(3)-N(21)-Co(1) 110.29(11)

C(4)-N(31)-Co(1) 109.29(11)

C(1)-N(11)-Co(1) 109.77(11)

C(6)-N(41)-Co(1) 110.31(11)

N(21)-C(5)-C(6) 107.66(14)

N(21)-C(3)-C(4) 110.65(14)

N(41)-C(6)-C(5) 109.47(14)

N(31)-C(4)-C(3) 106.99(14)

N(21)-C(2)-C(1) 107.74(14)

N(11)-C(1)-C(2) 108.80(14)

**Table S3**. Anisotropic displacement parameters (Å2 x 103) for *t*-[Co(tren)(NH3)OP(H)(O)2]ClO4.2H2O. The anisotropic displacement factor exponent takes the form: -2p2[ h2 a*2U11 + ... + 2 h k a* b* U12 ]

________________________________________________________________________

U11 U22 U33 U23 U13 U12

________________________________________________________________________

Co(1) 8(1) 9(1) 8(1) -1(1) 0(1) -2(1)

P(1) 12(1) 11(1) 10(1) -1(1) -2(1) -1(1)

Cl(1) 18(1) 20(1) 13(1) -2(1) -1(1) -4(1)

0(1) 17(1) 17(1) 11(1) 1(1) -4(1) -8(1)

N(21) 10(1) 11(1) 10(1) -1(1) 0(1) -3(1)

N(31) 12(1) 14(1) 10(1) -1(1) 1(1) -3(1)

N(11) 17(1) 10(1) 12(1) -1(1) -1(1) -2(1)

N(51) 11(1) 14(1) 13(1) -1(1) -1(1) -3(1)

O(3) 23(1) 19(1) 14(1) -2(1) -7(1) -4(1)

O(2) 19(1) 23(1) 18(1) 5(1) -3(1) -9(1)

O(61) 27(1) 19(1) 20(1) -1(1) -4(1) 4(1)

N(41) 12(1) 10(1) 12(1) -1(1) -1(1) -2(1)

O(6) 28(1) 24(1) 30(1) -1(1) -4(1) -12(1)

C(5) 15(1) 14(1) 12(1) -5(1) 0(1) -3(1)

O(71) 42(1) 48(1) 45(1) 19(1) -22(1) -33(1)

O(7) 38(1) 45(1) 39(1) -15(1) 22(1) -24(1)

C(3) 9(1) 19(1) 16(1) -1(1) -1(1) -4(1)

C(6) 18(1) 13(1) 14(1) -5(1) -1(1) -4(1)

O(8) 55(1) 37(1) 18(1) -8(1) -11(1) -4(1)

0(9) 38(1) 26(1) 53(1) -5(1) -20(1) 7(1)

C(4) 11(1) 17(1) 16(1) -1(1) 1(1) -5(1)

C(2) 16(1) 14(1) 10(1) 1(1) -2(1) -3(1)

C(1) 21(1) 12(1) 16(1) 0(1) -6(1) 0(1)

**Table S4**. Hydrogen coordinates ( x 104) and isotropic displacement parameters (Å2 x 103) for *t*-[Co(tren)(NH3)OP(H)(O)2]ClO4.2H2O.

________________________________________________________________________

x y z U(eq)

________________________________________________________________________

H(1) 8530(30) 5800(30) 9860(18) 19(6)

H(31A) 3904 7939 9546 15

H(31) 3086 9741 8980 15

H(11A) 4788 11721 8275 15

H(11B) 6331 11665 7521 15

H(51A) 8671 9447 7493 19

H(51B) 7853 9238 6590 19

H(51C) 8754 7646 7306 19

H(61A) 9830(50) 5160(50) 12860(30) 67(14)

H(61B) 9430(40) 5750(50) 11980(30) 41(8)

H(41A) 7488 5611 8214 14

H(41B) 5726 5548 8760 14

H(5A) 6385 7497 6084 16

H(5B) 4484 7093 5947 16

H(71A) 9420(50) 11660(50) 8830(30) 54(10)

H(71B) 8300(50) 10720(50) 8950(30) 54(10)

H(3A) 2051 7851 6947 18

H(3B) 1681 9805 7183 18

H(6A) 4533 5147 7476 17

H(6B) 6543 4680 7025 17

H(4A) 1194 8126 8744 17

H(4B) 2813 6524 8570 17

H(2A) 3311 10805 5770 16

H(2B) 5430 10524 5812 16

H(1A) 4283 13056 6453 20

H(1B) 2799 12156 7154 20

**Table S5**. Atomic coordinates ( x 104) and equivalent isotropic displacement parameters (Å2x 103) for [Co(cyclen)(H2O)OP(H)(O)2]ClO4.3H2O. U(eq) is defined as one third of the trace of the orthogonalized Uij tensor.

______________________________________________________________________________

x y z U(eq)

______________________________________________________________________________

Co(1) 1340(1) 8461(1) 2079(1) 14(1)

O(1) 1852(3) 7911(3) 761(2) 19(1)

P(1) 726(1) 7318(1) 103(1) 16(1)

O(2) -1227(3) 7897(3) 300(2) 20(1)

O(3) 1376(3) 7655(3) -1008(2) 21(1)

O(4) -1020(3) 9401(3) 1722(2) 17(1)

N(1) 537(4) 6531(3) 2798(2) 18(1)

C(1) -328(5) 6725(4) 3835(3) 24(1)

C(2) -740(5) 8369(4) 3885(3) 24(1)

N(2) 775(4) 9117(3) 3362(2) 19(1)

C(3) 490(5) 10791(4) 3156(3) 24(1)

C(4) 2003(5) 11327(4) 2428(3) 21(1)

N(3) 2450(4) 10324(3) 1646(2) 16(1)

C(5) 4405(5) 9847(4) 1509(3) 20(1)

C(6) 4894(5) 8526(4) 2361(3) 22(1)

N(4) 3659(4) 7442(3) 2313(2) 17(1)

C(7) 3646(5) 6053(4) 3091(3) 21(1)

C(8) 2116(5) 5340(4) 2884(3) 24(1)

Cl(1) 5980(1) 2158(1) 4446(1) 27(1)

O(11) 4261(4) 2757(3) 4788(3) 49(1)

O(12) 7124(4) 3323(3) 4314(2) 40(1)

O(13) 6681(4) 892(3) 5186(2) 34(1)

O(14) 5970(4) 1679(4) 3503(2) 45(1)

O(1W) 1503(4) 5494(3) -2293(2) 30(1)

O(2W) -4158(4) 6515(3) 607(2) 30(1)

O(3W) 4958(4) 6373(3) -1272(2) 36(1)

**Table S6**. Bond lengths [Å] and angles [°] for [Co(cyclen)(H2O)OP(H)(O)2]ClO4.3H2O.

Co(1)-N(4) 1.909(3)

Co(1)-O(1) 1.922(2)

Co(1)-N(2) 1.922(3)

Co(1)-O(4) 1.954(3)

Co(1)-N(3) 1.965(3)

Co(1)-N(1) 1.976(3)

O(1)-P(1) 1.528(2)

P(1)-O(3) 1.512(2)

P(1)-O(2) 1.528(3)

N(1)-C(8) 1.494(4)

N(1)-C(1) 1.511(4)

C(1)-C(2) 1.486(5)

C(2)-N(2) 1.482(5)

N(2)-C(3) 1.470(4)

C(3)-C(4) 1.514(5)

C(4)-N(3) 1.502(4)

N(3)-C(5) 1.504(4)

C(5)-C(6) 1.516(5)

C(6)-N(4) 1.485(4)

N(4)-C(7) 1.468(4)

C(7)-C(8) 1.506(5)

Cl(1)-O(11) 1.416(3)

Cl(1)-O(14) 1.424(3)

Cl(1)-O(13) 1.439(3)

Cl(1)-O(12) 1.450(3)

N(4)-Co(1)-O(1) 84.30(11)

N(4)-Co(1)-N(2) 97.90(13)

O(1)-Co(1)-N(2) 176.95(11)

N(4)-Co(1)-O(4) 174.22(11)

O(1)-Co(1)-O(4) 90.15(10)

N(2)-Co(1)-O(4) 87.70(12)

N(4)-Co(1)-N(3) 85.91(12)

O(1)-Co(1)-N(3) 92.45(11)

N(2)-Co(1)-N(3) 85.61(12)

O(4)-Co(1)-N(3) 95.96(11)

N(4)-Co(1)-N(1) 85.54(12)

O(1)-Co(1)-N(1) 97.13(11)

N(2)-Co(1)-N(1) 85.17(12)

O(4)-Co(1)-N(1) 93.57(12)

N(3)-Co(1)-N(1) 166.45(12)

P(1)-O(1)-Co(1) 131.42(15)

O(3)-P(1)-O(1) 111.50(14)

O(3)-P(1)-O(2) 112.87(14)

O(1)-P(1)-O(2) 111.33(13)

C(8)-N(1)-C(1) 111.0(3)

C(8)-N(1)-Co(1) 107.5(2)

C(1)-N(1)-Co(1) 109.7(2)

C(2)-C(1)-N(1) 110.0(3)

N(2)-C(2)-C(1) 107.4(3)

C(3)-N(2)-C(2) 115.7(3)

C(3)-N(2)-Co(1) 107.6(2)

C(2)-N(2)-Co(1) 107.5(2)

N(2)-C(3)-C(4) 107.6(3)

N(3)-C(4)-C(3) 109.5(3)

C(4)-N(3)-C(5) 111.0(3)

C(4)-N(3)-Co(1) 110.3(2)

C(5)-N(3)-Co(1) 107.4(2)

N(3)-C(5)-C(6) 107.7(3)

N(4)-C(6)-C(5) 103.5(3)

C(7)-N(4)-C(6) 119.2(3)

C(7)-N(4)-Co(1) 112.2(2)

C(6)-N(4)-Co(1) 111.8(2)

N(4)-C(7)-C(8) 104.7(3)

N(1)-C(8)-C(7) 108.3(3)

O(11)-Cl(1)-O(14) 110.6(2)

O(11)-Cl(1)-O(13) 110.47(19)

O(14)-Cl(1)-O(13) 109.50(18)

O(11)-Cl(1)-O(12) 109.24(19)

O(14)-Cl(1)-O(12) 109.09(18)

O(13)-Cl(1)-O(12) 107.84(18)

**Table S7**. Anisotropic displacement parameters (Å2 x 103) for [Co(cyclen)(H2O)OP(H)(O)2]ClO4.3H2O. The anisotropic displacement factor exponent takes the form: -2p2[ h2 a*2U11 + ... + 2 h k a* b* U12 ]

________________________________________________________________________

U11 U22 U33 U23 U13 U12

______________________________________________________________________________

Co(1) 13(1) 17(1) 13(1) -4(1) -1(1) -1(1)

O(1) 14(1) 25(1) 17(1) -7(1) 0(1) -1(1)

P(1) 18(1) 16(1) 16(1) -4(1) -2(1) -1(1)

O(2) 16(1) 25(1) 21(1) -7(1) -2(1) -4(1)

O(3) 24(1) 23(1) 16(1) -6(1) -2(1) 2(1)

O(4) 15(1) 18(1) 19(1) -7(1) -5(1) -1(1)

N(1) 15(2) 20(2) 20(2) -4(1) -3(1) -4(1)

C(1) 23(2) 31(2) 18(2) -4(2) 5(2) -10(2)

C(2) 21(2) 31(2) 18(2) -5(2) 8(2) -6(2)

N(2) 19(2) 24(2) 15(2) -7(1) -1(1) -5(1)

C(3) 30(2) 21(2) 21(2) -7(2) -2(2) 2(2)

C(4) 19(2) 20(2) 29(2) -12(2) -2(2) -4(2)

N(3) 13(2) 17(1) 16(1) -2(1) -3(1) -1(1)

C(5) 13(2) 21(2) 25(2) -2(2) -2(2) -5(2)

C(6) 15(2) 26(2) 25(2) -2(2) -5(2) -5(2)

N(4) 13(2) 19(2) 19(2) -3(1) -3(1) 1(1)

C(7) 13(2) 19(2) 27(2) -1(2) -1(2) 2(2)

C(8) 27(2) 18(2) 26(2) 0(2) -6(2) 0(2)

Cl(1) 26(1) 32(1) 22(1) -1(1) -3(1) -4(1)

O(11) 29(2) 43(2) 65(2) 0(2) 11(2) 6(2)

O(12) 48(2) 41(2) 34(2) -8(1) 5(2) -21(2)

O(13) 40(2) 33(2) 30(2) -6(1) -15(1) 4(1)

O(14) 52(2) 66(2) 23(2) -10(1) -7(2) -20(2)

O(1W) 36(2) 33(2) 25(2) -10(1) 4(1) -15(1)

O(2W) 22(2) 35(2) 36(2) -14(1) 4(1) -10(1)

O(3W) 32(2) 33(2) 44(2) -8(1) 2(2) -5(1)

**Table S8**. Hydrogen coordinates ( x 104) and isotropic displacement parameters (Å2 x 103) for [Co(cyclen)(H2O)OP(H)(O)2]ClO4.3H2O.

________________________________________________________________________

x y z U(eq)

________________________________________________________________________

H(1) 910 5844 379 12(9)

H(4C) -1090(50) 10370(20) 1460(20) 20

H(4D) -1340(50) 8990(30) 1250(20) 20

H(2) -267 6258 2425 22

H(1A) -1425 6252 3968 29

H(1B) 472 6207 4363 29

H(2A) -1826 8821 3546 28

H(2B) -926 8507 4601 28

H(3) 1734 8787 3750 23

H(3A) 453 11180 3796 29

H(3B) -642 11171 2850 29

H(4A) 1669 12394 2089 26

H(4B) 3043 11287 2807 26

H(5) 2049 10847 1030 19

H(5A) 5042 10706 1534 24

H(5B) 4728 9532 843 24

H(6A) 6132 8062 2248 26

H(6B) 4727 8858 3026 26

H(4) 4048 7083 1715 20

H(7A) 3479 6301 3781 25

H(7B) 4763 5358 3029 25

H(8A) 2388 4937 2245 29

H(8B) 1886 4486 3445 29

H(11W) 1440(50) 6040(40) -1840(20) 36

H(12W) 2140(50) 5870(40) -2810(20) 36

H(21W) -3170(40) 6880(40) 540(30) 36

H(22W) -4350(50) 6490(50) -39(19) 36

H(31W) 4680(50) 5420(30) -1020(30) 44

H(32W) 3880(40) 6930(40) -1240(30) 44

**Table S9**. Hydrogen bonds for [Co(cyclen)(H2O)OP(H)(O)2]ClO4.3H2O [Å and o].

D-H...A d(D-H) d(H...A) d(D...A) <(DHA)

________________________________________________________________________

O(4)-H(4D)...O(2) 0.87(2) 1.76(2) 2.593(3) 161(4)

O(1W)-H(11W)...O(3) 0.86(2) 2.00(2) 2.842(3) 169(3)

O(2W)-H(21W)...O(2) 0.87(2) 1.84(2) 2.705(4) 172(4)

O(3W)-H(32W)...O(3) 0.90(2) 1.95(2) 2.838(4) 166(3)

O(4)-H(4C)...O(3)#1 0.88(2) 1.75(2) 2.628(3) 176(4)

N(1)-H(2)...O(1W)#2 0.93 2.02 2.816(4) 142.8

N(2)-H(3)...O(13)#3 0.93 2.07 2.919(4) 150.5

N(3)-H(5)...O(2)#1 0.93 2.03 2.959(4) 176.5

N(4)-H(4)...O(2W)#4 0.93 2.01 2.880(4) 155.3

O(1W)-H(12W)...O(12)#5 0.85(2) 2.07(2) 2.871(4) 158(4)

O(2W)-H(22W)...O(3W)#6 0.90(2) 1.83(2) 2.727(4) 172(3)

O(3W)-H(31W)...O(2W)#2 0.91(2) 1.83(2) 2.731(4) 176(4)

________________________________________________________________________

Symmetry transformations used to generate equivalent atoms:

#1 -x,-y+2,-z #2 -x,-y+1,-z #3 -x+1,-y+1,-z+1

#4 x+1,y,z #5 -x+1,-y+1,-z #6 x-1,y,z

**Table S 10**. Crystal data and structure refinement for *t*-[Co(tren)(NH3)OP(H)(O)2](ClO4).2H2O and *syn*(OP(H)(O)2),*anti*(OH2)-[Co(cyclen)(OH2)OP(H)(O)2]ClO4.3H2O

| Empirical Formula | C6H26ClCoN5O9P | C8H29ClCoN4O11P |
| --- | --- | --- |
| Formula weight | 437.67 | 482.70 |
| Temperature | 168(2) K | 158(2) K |
| Wavelength | 0.71073 Å | 0.71073 Å |
| Crystal system | Triclinic | Triclinic |
| Space group | P-1 | P-1 |
| Unit cell dimensions | a = 7.7245(8) Å | a = 7.715(3) Å |
|  | b = 7.9011(7) Å | b = 9.047(3) Å |
|  | c = 13.5297(7) Å | c = 13.478(3) Å |
|  | = 77.282(5)° |  = 78.51(2)° |
|  | = 84.402(7)° |  = 83.63(2)° |
|  |  = 77.001(12)° |  = 81.03(3)° |
| Volume | 783.84(11) Å3 | 907.5(5) Å3 |
| Z | 2 | 2 |
| Density (calcd.) | 1.854 Mg/m3 | 1.766 Mg/m3 |
| Absorption coefficient | 1.422 mm-1 | 1.244 mm-1 |
| F(000) | 456 | 504 |
| Crystal size | 0.54 x 0.42 x 0.14 mm3 | 0.60 x 0.15 x 0.15 mm3 |
| Theta range for data collection | 2.70 to 27.99° | 2.32 to 24.99 o |
| Index ranges | -9  h 0, -10 k 9,  -17  l  17 | -9  h  2, -10  k  10,  -16  l  16 |
| Reflections collected | 3978 | 3963 |
| Independent reflections | 3738 [R(int) = 0.0180] | 3180 [R(int) = 0.0283] |
| Refinement method | Full matrix least squared on F2 | Full matrix least squared on F2 |
| Data/ restraints/ parameters | 3738 / 0 / 229 | 3180/ 12/ 261 |
| Goodness-of -fit on F2 | 1.094 | 0.965 |
| Final R indices [I> 2sigma(I)] | R1 = 0.0275, wR2 = 0.0675 | R1 = 0.0385, wR2 = 0.0888 |
| R indices (all data) | R1 = 0.0326, wR2 = 0.0699 | R1 = 0.0528, wR2 = 0.0925 |
| Largest diff. peak and hole | 0.480 and -0.414 e.Å-3 | 0.410 and -0.346 e.Å-3 |
